# Supplementary material for: A highly selective and sensitive single click novel fluorescent off–on sensor for copper and sulfide ions detection directly in aqueous solution using curcumin nanoparticles
Source: Royal Society of Chemistry journal article supplement (doi:10.1039/c5nj01228g), 2015-01-01
Supplement: c5nj01228g1.pdf [file c5nj01228g1.pdf]

### Supporting Information:

#### A highly selective and sensitive single click novel fluorescent off-on sensor for copper and sulfide ions detection directly in aqueous solution using curcumin nanoparticles

Dhanaji P. Bhopate, Prasad G. Mahajan, Kalyanrao M Garadkar, Govind B. Kolekar and  
Shivajirao R. Patil\*

Fluorescence Spectroscopy Laboratory, Department of Chemistry, Shivaji University Kolhapur.

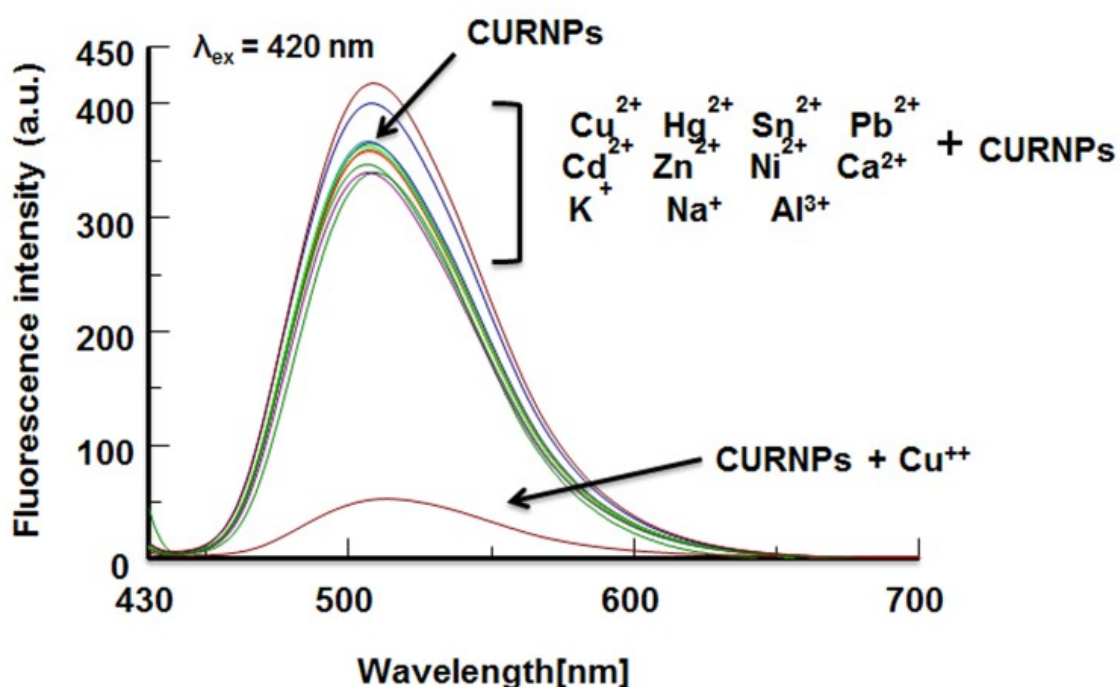

**Fig. S1:** Fluorescence responses of CURNPs, ( $\lambda_{ex} = 420 \text{ nm}$ ) without and upon the addition of metal ions (concentration  $62.5 \text{ ng.mL}^{-1}$  of each  $\text{Hg}^{2+}$ ,  $\text{Sn}^{2+}$ ,  $\text{Pb}^{2+}$ ,  $\text{Cd}^{2+}$ ,  $\text{Zn}^{2+}$ ,  $\text{Ni}^{2+}$ ,  $\text{Ca}^{2+}$ ,  $\text{K}^+$ ,  $\text{Na}^+$ ,  $\text{Al}^{3+}$  and  $\text{Cu}^{2+}$ ) in aqueous solution of pH 4 by using acetate buffer.

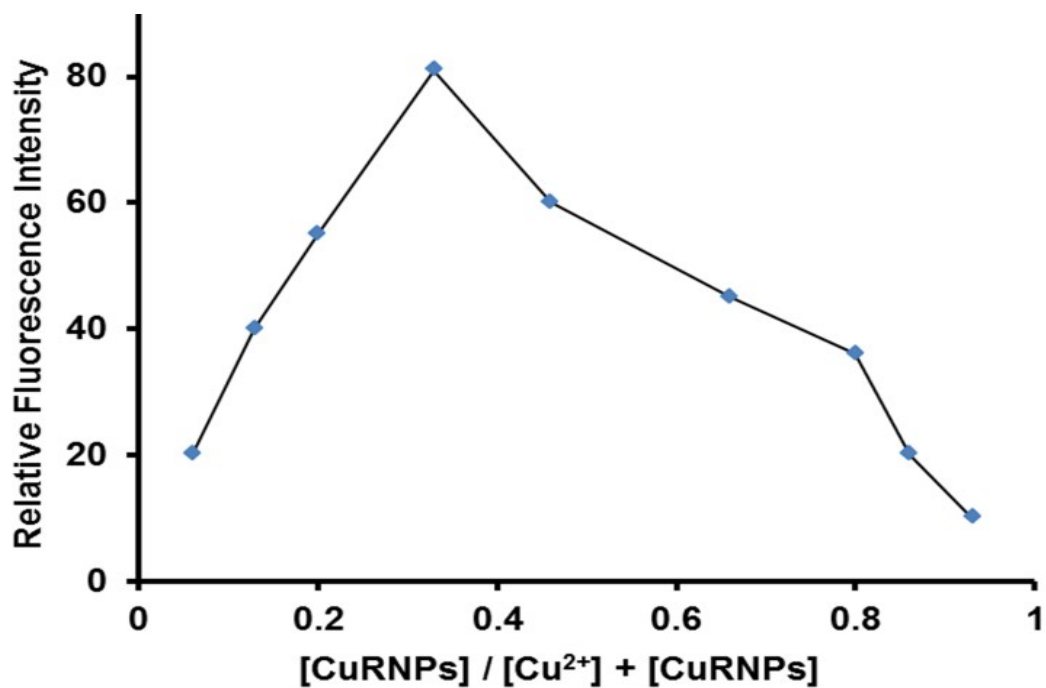

**Fig. S2:** Job plot for determining the stoichiometry of CURNPs and Cu<sup>2+</sup> in aqueous solution of pH=4.. The total concentration of CURNPs and Cu<sup>2+</sup> is 15 μM,  $X_{\text{CURNPs}} = [\text{CURNPs}] / ([\text{Cu}^{2+}] + [\text{CURNPs}])$ .

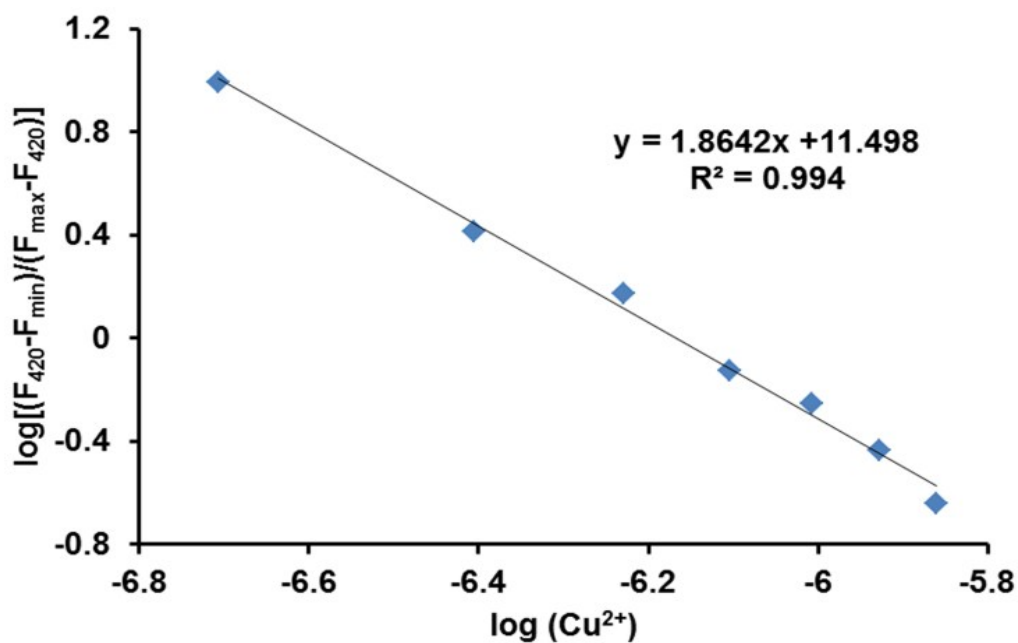

**Fig. S3:** Hill Plot for bonding mode between CURNPs and Cu<sup>2+</sup> ions.

**Conclusion:** Hill coefficient ( $n$ ) is 1.864 indicating CURNPs binds with Cu<sup>2+</sup> ion with ratio 2:1.

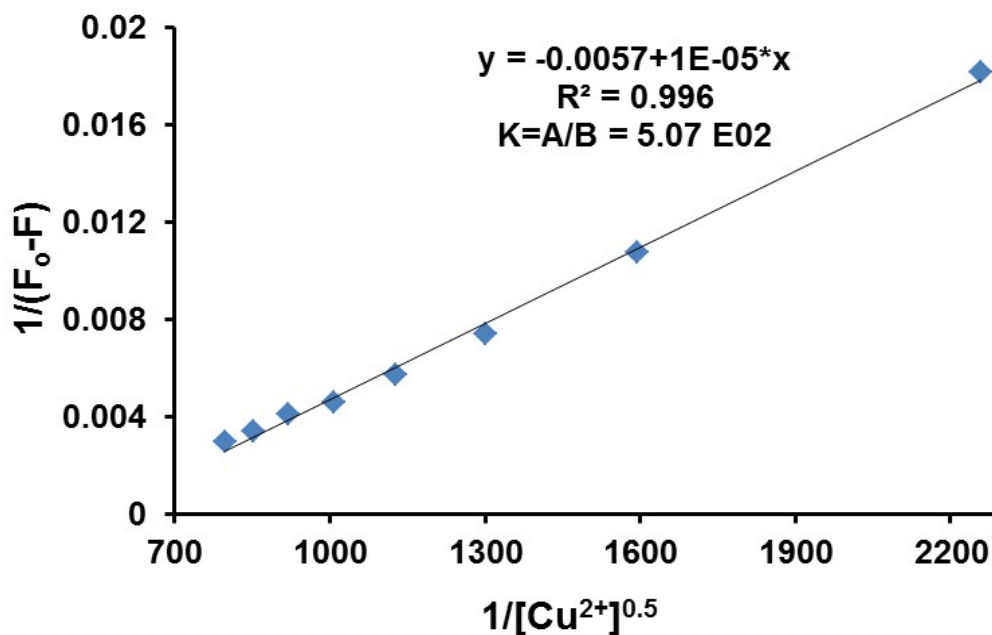

**Fig. S4:** The binding constants (K) from Benesi–Hildebrand plots of fluorescence intensity response of the CURNPs toward  $Cu^{2+}$  anion.

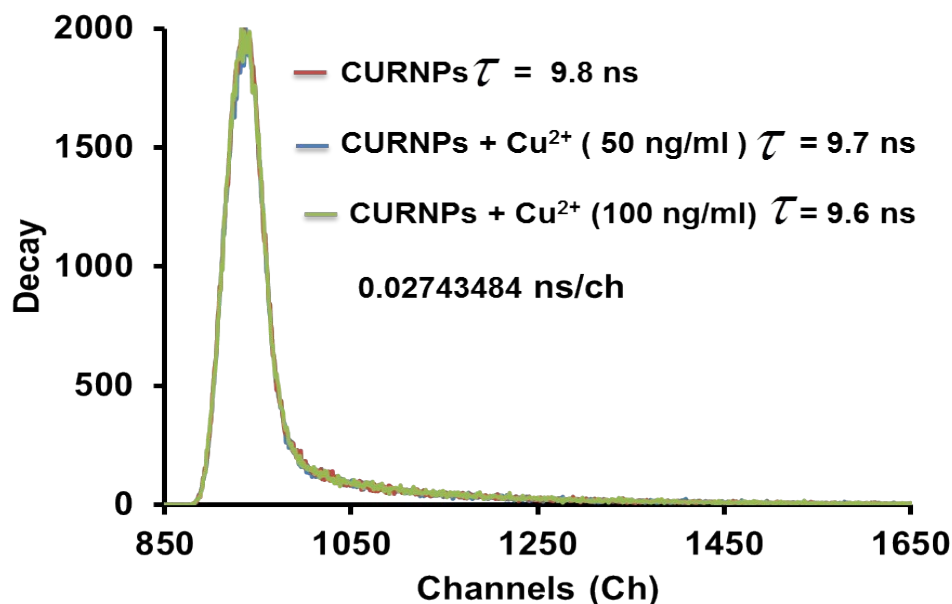

**Figure S5:** Representation of the lifetime spectra of CURNPs and their variation in response to the addition of  $Cu^{2+}$  to CURNPs suspension: (Green) in the absence  $Cu^{2+}$ , blue and red in the presence 50 and 100  $ng \cdot mL^{-1}$   $Cu^{2+}$  respectively.

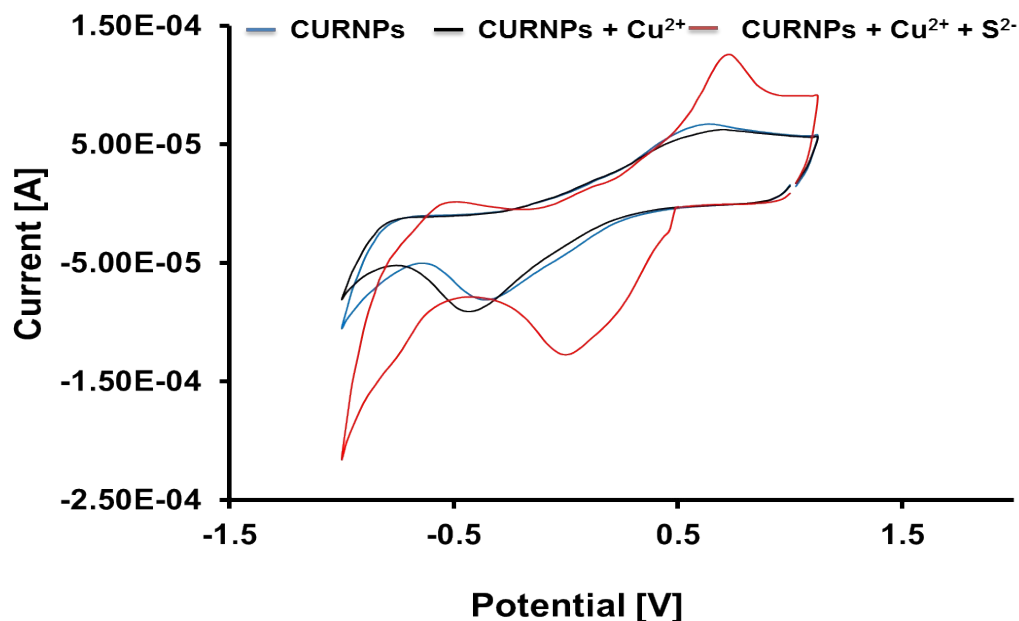

**Figure S6:** Cyclic voltammogram of CURNPs without ions (Blue line), CURNPs + [Cu<sup>2+</sup> 50 ng.ml<sup>-1</sup>] (dark blue), and [CURNPs + [Cu<sup>2+</sup> 50ng.ml<sup>-1</sup>] + [S<sup>2-</sup> 7.5 ng.ml<sup>-1</sup>]] (red line). The CV measurement was done by applying a voltage potential at 1.4V, scan rate 50 mv/s. using aqueous solvent. The working and counter electrode was Platinum electrode, reference electrode was Ag/Agcl.

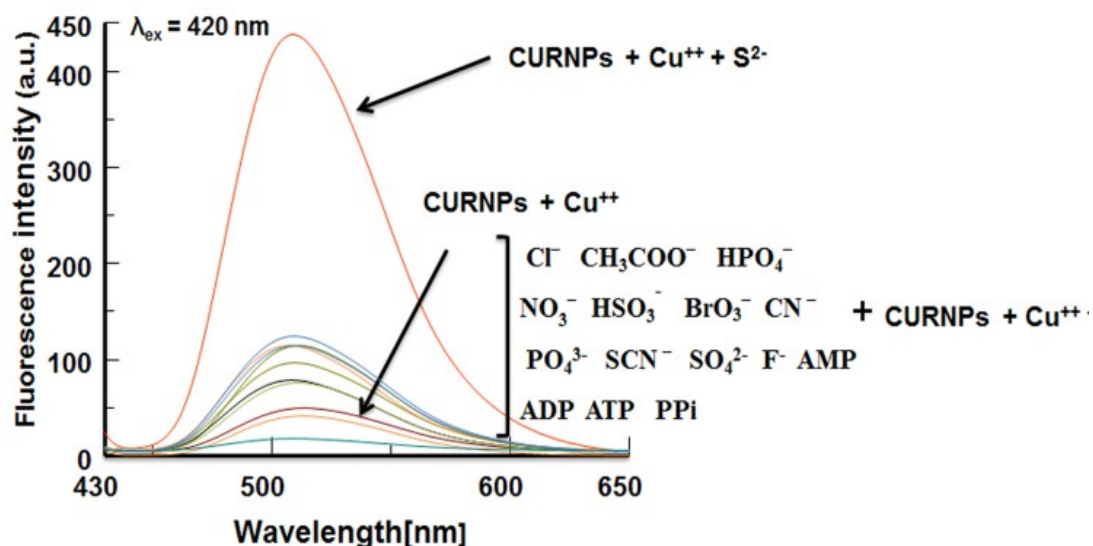

**Fig. S7:** Fluorescence responses of CURNPs-Cu<sup>2+</sup> ensemble suspension ( $\lambda_{ex} = 420 \text{ nm}$ ) and upon the addition of anions (7.5 ng.mL<sup>-1</sup> each of Cl<sup>-</sup>, CH<sub>3</sub>COO<sup>-</sup>, HPO<sub>4</sub><sup>-</sup>, NO<sub>3</sub><sup>-</sup>, HSO<sub>3</sub><sup>-</sup>, BrO<sub>3</sub><sup>-</sup>, PO<sub>4</sub><sup>3-</sup>, SCN<sup>-</sup>, SO<sub>4</sub><sup>2-</sup>, F<sup>-</sup> and S<sup>2-</sup> in aqueous solution of pH 4 by using acetate buffer.

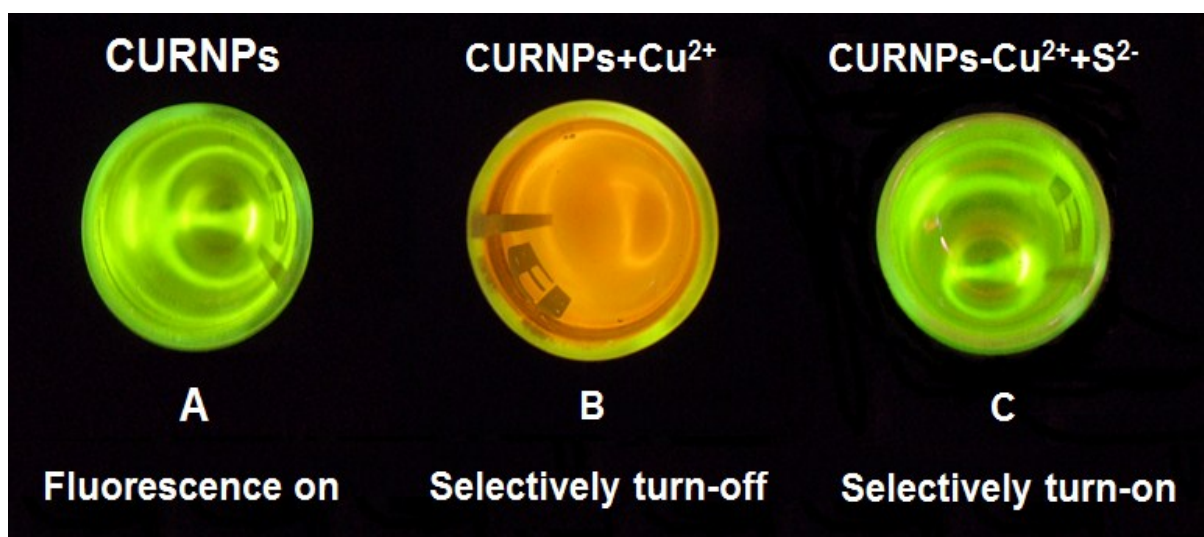

**Figure S8:** Fluorescence images of curcumin nanoparticles (A), fluorescence off image (B) of curcumin nanoparticles by copper ion i.e. (CURNPs+ Cu<sup>2+</sup>) under excitation and fluorescence on images (C) of CURNPs+ Cu<sup>2+</sup> by Sulfide ion under excitation.
